# Supplementary material for: Transmetallation and silylation products of aminal carbanions
Source: Royal Society of Chemistry journal article supplement (doi:10.1039/b911925f), 2009-01-01
Supplement: b911925f.pdf [file b911925f.pdf]

### Supporting Information

$^1\text{H}$  NMR of **1c** (600 MHz, 243 K):

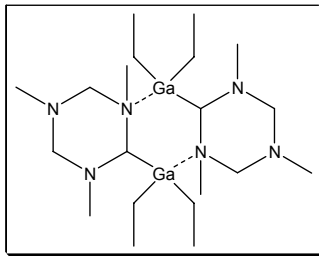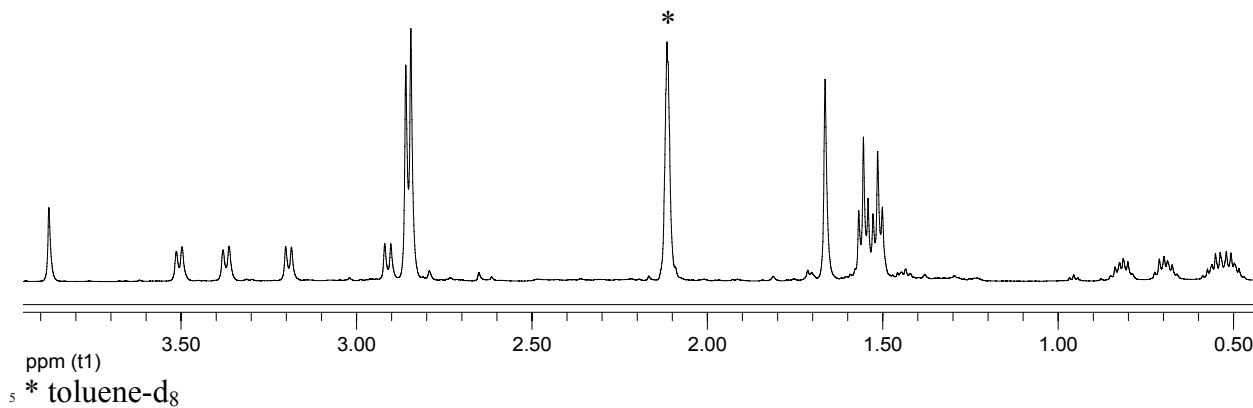

$^1\text{H}$  NMR of **2** (500 MHz, C<sub>6</sub>D<sub>6</sub>):

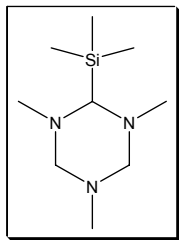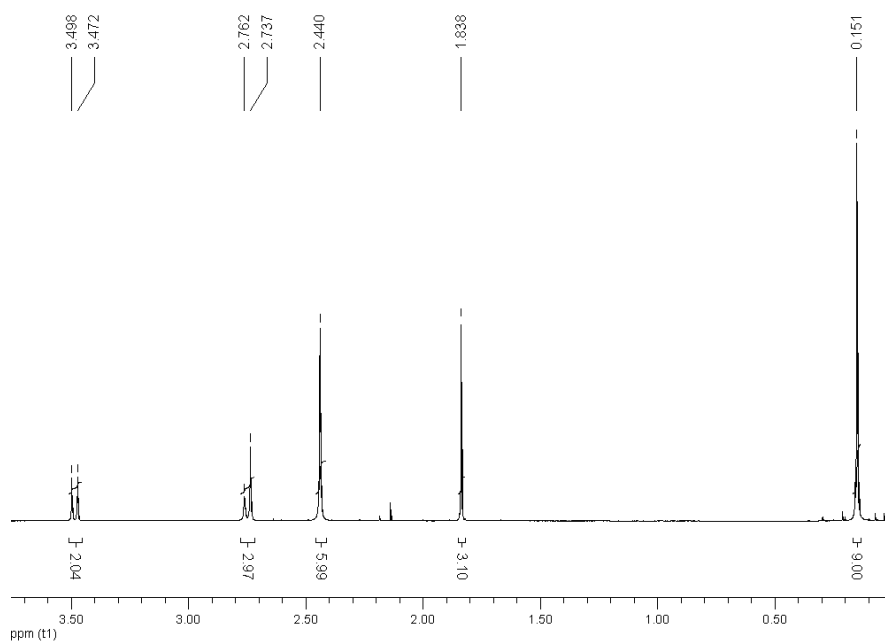

<sup>10</sup>  $^1\text{H}$  NMR of **3** (500 MHz):

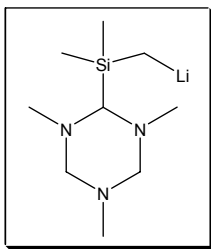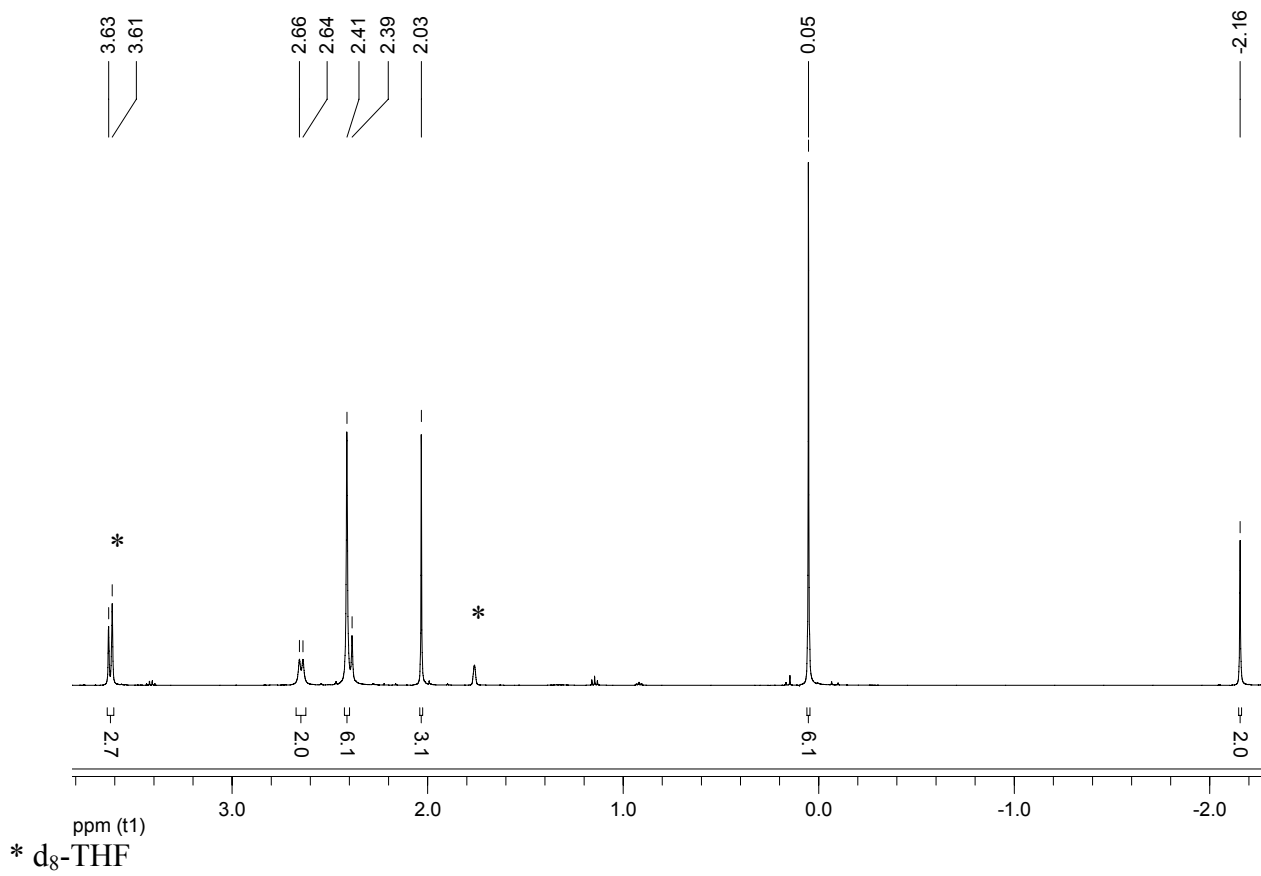

$^{13}\text{C}$  NMR of **3** (125 MHz,  $d_8$ -THF):

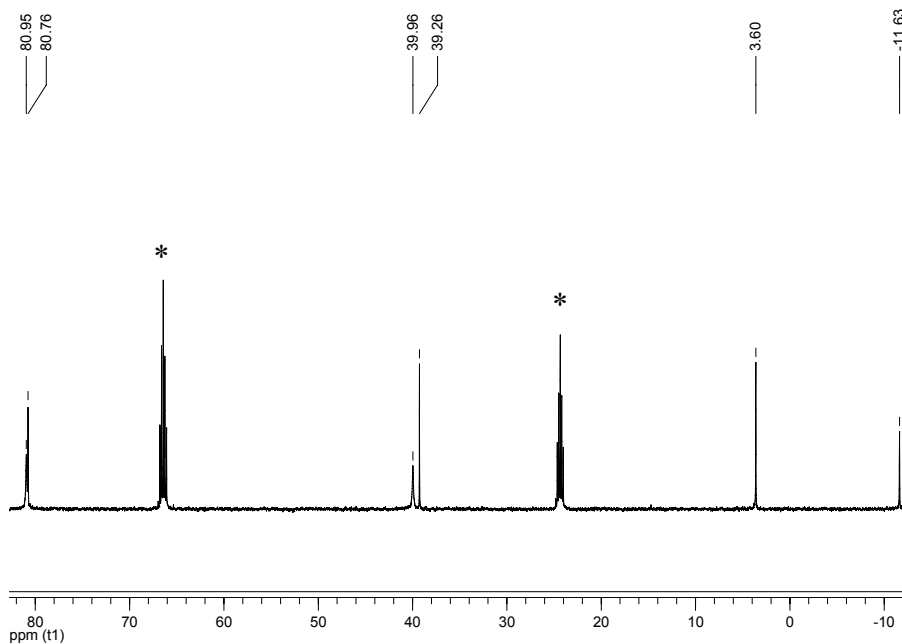

\*  $d_8$ -THF

<sup>5</sup> $^7\text{Li}$  NMR of **3** (194 MHz,  $d_8$ -THF):

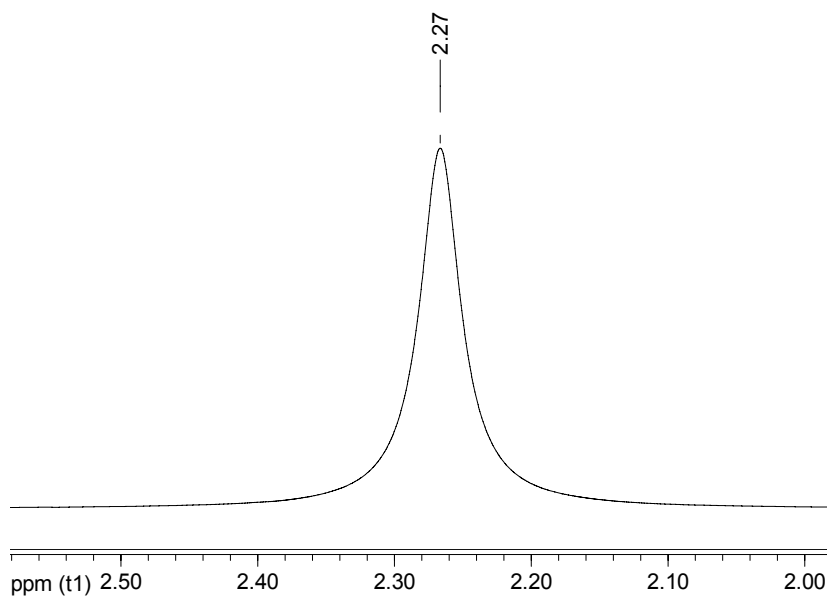

Elemental analysis of **3**:

<sup>10</sup> Found: C, 52.64; H, 10.75; N, 20.47. Calc. for  $\text{C}_9\text{H}_{22}\text{LiN}_3\text{Si}$  (207.17): C, 52.14; H, 10.70, N, 20.27%.
